# Supplementary material
Source: PubMed Central journal article supplement (PMC2796333)
Supplement: halms419047-supplement_1.pdf [file halms419047-supplement_1.pdf]

**Table S1 (Supplemental Table).** Primer sequences.

| <b>Gene name</b> | <b>Access number</b> | <b>Assay ID</b> |
|------------------|----------------------|-----------------|
| C-myc            | NM_002467            | Hs0015348_m1    |
| Bcl-XL           | NM_138578            | Hs00236329_m1   |
| GAPDH            | NM_002046            | Hs99999905_m1   |
