# Supplementary material
Source: PubMed Central journal article supplement (PMC2796333)

**Figure S1 legend (Supplemental data)**

**(A) STAT3 inhibitor peptide reduces MEC04 cell growth and increases cell death. (A)**

Cells were incubated with or without 2 mM inhibitor peptide for 24 to 72 hours without rIL-2, and the number of living cells was estimated by the trypan blue exclusion method. Results represent the mean  $\pm$  SD of 3 independent experiments. **(B)** Cell lysates were analyzed by western-blotting with the indicated antibodies after 48 hours of exposure to STAT3 inhibitor peptide (2 mM).

**Figure S1 (supplemental data).**

A.

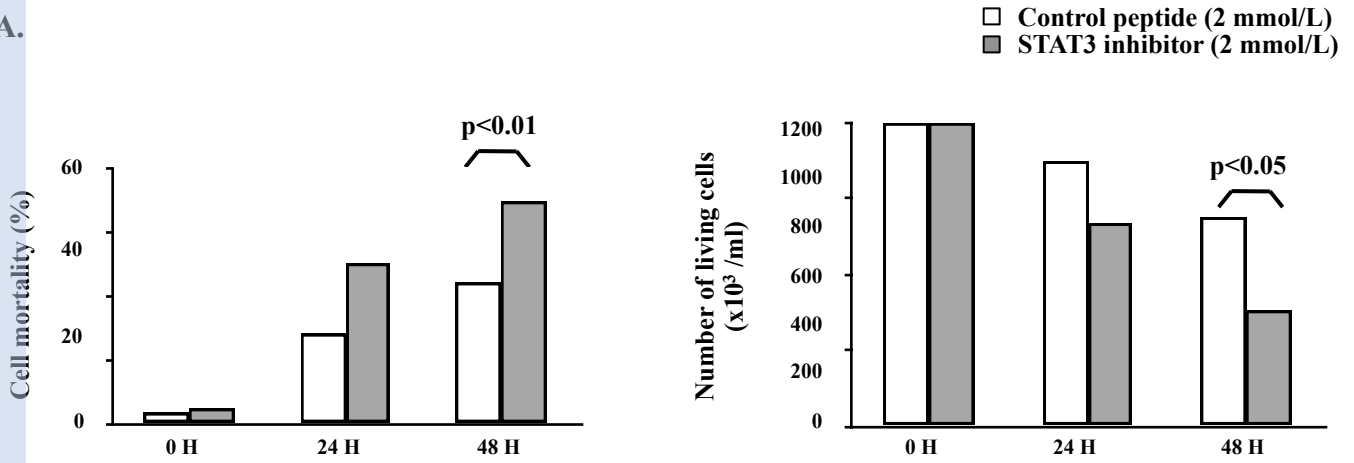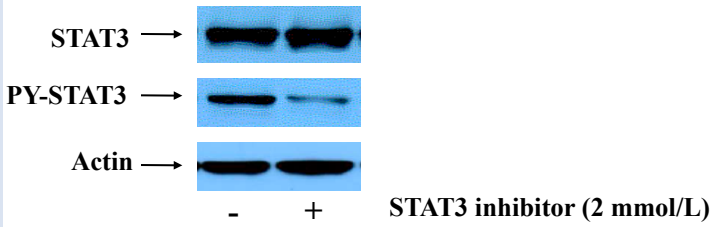

Supplement: halms419047-supplement_2.pdf [file halms419047-supplement_2.pdf]
